# Supplementary figures and images for: A Mouse Model Suggests That Heart Failure and Its Common Comorbidity Sleep Fragmentation Have No Synergistic Impacts on the Gut Microbiome
Source: MDPI journal article supplement (doi:10.3390/microorganisms9030641), 2021-03-19

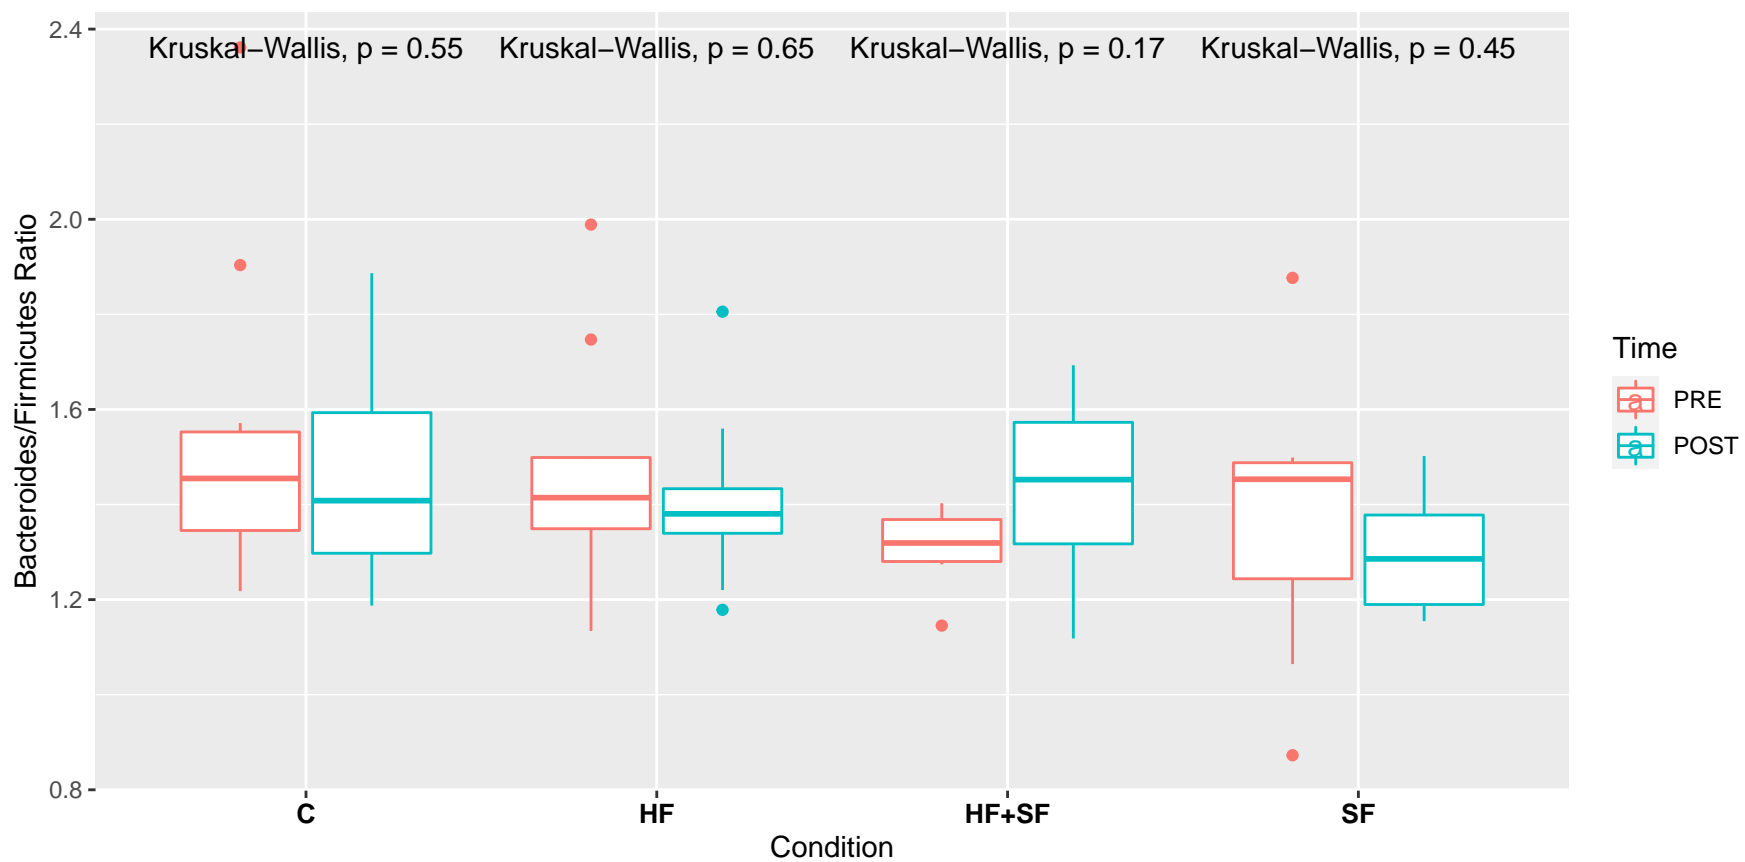

Supplement: s1 [file s1]

Species

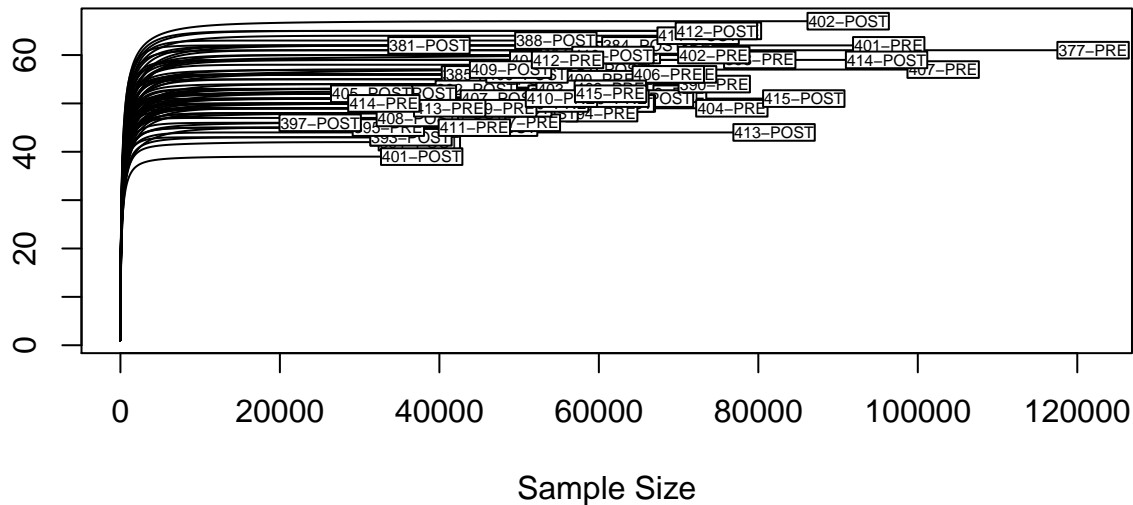

Supplement: s1 [file s1]
